# Supplementary material for: Genome-Wide Association Study Identifies NBS-LRR-Encoding Genes Related with Anthracnose and Common Bacterial Blight in the Common Bean
Source: Front Plant Sci. 2017 Aug 9;8:1398. doi: 10.3389/fpls.2017.01398 (PMC5552710; doi:10.3389/fpls.2017.01398)
Supplement: Table S1 — The phenotypic data of 183 common bean germplasms for ANT and CBB. [file Table1.XLSX]

## Sheet: Sheet1
Table S1 The phenotypic data of 183 common bean germplasms for ANT and CBB.
	Average severity
Variety	ANT	CBB
YUN DOU	9	9
MAO YAN DOU	7	8
QUE DAN DOU	1	7.2
HUA SE JIAN DOU	5	3.6
HUA HUI HUI DOU	5	7.5
TIAN E DOU	9	5.4
DA YUN DOU	0	3.67
SHU BAI DOU	9	4.11
XIAO FAN DOU	9	5
XIAO BAI DOU	9	5.67
JING MI DOU	1	6.33
LONG 70-8014	9	5
MEI MAO DOU	9	5.57
TIE JIA ZI YUN DOU	9	4.63
ZHAN QIU HUA FAN DOU	1	5.8
JIA QUE DAN	1	7.2
YOU DOU JIAO	1	7.33
DA MA CHANG	7	8.33
BAI WU YA CAI DOU	5	8.33
BAI YUN DOU	3	8.5
BAI WU YA CAI DOU	3	8.33
BAI YUN DOU	3	6
FAN DOU	5	5.5
JING MI DOU	1	3.6
XIAO JIN HUANG	9	6.75
TANG DOU	5	7.4
WU YA CAI DOU	1	5.67
FAN DA DOU	9	9
FAN DOU	9	6.5
ZHAO JIA HUANG FAN DOU	9	3.56
DA HUA HONG	9	9
DA HONG DOU	1	8.6
JING DOU	0	6.6
CAI DOU	9	4.2
KUAN BIAN DOU	9	9.33
YANG CAI DOU	3	3.6
YANG MAN CAI DOU	9	4.2
BA YUE ZA DOU ZI	9	6.8
MEI JING DOU	0	5.75
CAI DOU	9	4.29
YANG CAI DOU	9	3.4
BAI CAI DOU	1	4.4
FEN HONG ZI PI LIAN DOU	9	9.4
ZI HONG DOU	9	9.4
XIA HONG DOU	9	6.17
HUANG HONG DOU	0	5.25
WU SI JIAO DOU	9	9.2
XIAO HUI DOU	9	10
XIAO HUI DOU	9	10
LIAN DOU	0	6.2
HEI JIN DOU	9	8.8
BAI LIAN DOU	9	9
FEN HUA MEI DOU	9	6
HONG HUA LIAN SAN FEN DOU	9	6.2
SAN KAI DOU	9	9.4
WU JIN DOU JIAO	9	9.5
HUA CAI DOU	0	8.33
HUI XIAO DOU	1	4.75
DA HONG JIN DOU	3	7.82
HUI XIE ZI	9	6.83
WU YUE HUANG	9	4.71
R-5550	1	5.5
BAT336	7	4
YANG CAI DOU	9	9.25
MEI GUO CAI DOU	3	8.2
HONG YUN DOU 2	1	7.2
BAI LIAN DOU	9	5.5
MIAN DOU JIA	1	7.5
LAN CHANG LIAN DOU	9	4.75
DANG DI CAI DOU	9	5.14
BAI FAN DOU	1	5.33
HONG YUN DOU	5	3.67
HUA FAN DOU	7	4.5
JI YAO ZI DOU	5	8.6
XIAO ZHU YAO DOU	5	9.2
HONG YAO ZI DOU	0	7
PANG DOU	9	6.75
BA YUE DOU	9	4.6
JIA BA QU BO	9	7
SI SHI DOU	7	8.6
HEI AI ZI DOU	7	5.6
SI JI DOU	7	7.33
BI HUA DOU	7	9
HUA DOU	3	8
BAI YANG DOU	1	5
YING KE JI YAO DOU	0	4
YUAN SHA DOU	3	8.25
HONG YUN DOU	1	7
HONG JIN DOU	5	6.6
HUANG DOU	3	5.5
DA DOU ZI	7	8
MEI HUA DOU	1	7.8
HUA MU WAN DOU	3	7.75
DA LI BAI CAI DOU	5	9
F3363	0	4.25
F3370	9	2
FA YIN 11 HAO	0	5.2
XIAO BAI DOU	9	9.4
LAO HU DUN	9	5.6
YUN DOU	9	6
JIA CAI DOU	9	6.67
GAO SI JI DOU	9	3.63
SI JI DOU	9	4.4
BAI MEI DOU	9	4.67
ZAO CAI DOU	7	8.25
HUA MEI DOU	5	7.67
SI YUE E	7	7.5
HUA SI JI DOU	9	5.2
DA HONG DOU	9	3.6
SI JI DOU	3	9.25
HEI HUA DOU	9	3.2
HONG HUA DOU	3	7.67
LAO BAI YUN DOU	9	9.5
HONG YUN DOU	9	6.78
HONG DOU	0	6.67
JIN LIAN DOU	9	1.8
YUN DOU	7	7.25
AI SHENG DOU	1	7.2
ANT49	0	9.25
BRB-130	9	6.33
LRK32	0	2.5
SEQ1006	0	3.67
BRB-133	3	4.67
DRK139	0	3.4
DOR476	3	4.5
BAT58	7	6.33
SEQ1009	5	8.27
HUA SHENG DOU	0	4.2
BAI YUN DOU	0	7
MIAN JIAO DOU	9	8
HEI JIN DOU	7	3.6
HEI YUN DOU	9	3.5
NAI HUA YUN DOU	0	4.8
NAI HUA YUN DOU	0	3.75
NAI HUA YUN DOU	0	8.4
NAI HUA YUN DOU	9	6.2
NAI HUA YUN DOU	7	5.25
NAI HUA YUN DOU	9	5.57
NAI HUA YUN DOU	7	8.25
NAI HUA YUN DOU	5	6.8
NAI HUA YUN DOU	9	3.89
Gally	0	3.86
NV	9	6.33
LONG YUN DOU 5 HAO	1	3.88
LONG22-0579	9	5.25
PIN YUN 1 HAO	5	7
PIN YUN 2 HAO	5	3.75
F5037	9	4.5
LONG270270	3	3.25
LONG270280	9	3.25
BEN DI XIA HUA DOU	9	9.8
HONG JIN DOU	0	4.5
F5518	7	6.4
60 dias	0	3.75
Cubano	5	2.4
IPA 8	1	6.8
BR IPA 10	7	3
Milionário 1732	5	3
Jalo Precoce	3	4
Novo Jalo	0	3
EMGOPA 201-Ouro	1	8.67
Tambó	3	4.4
Mulata Gorda	5	7.33
Carnaval	5	7.67
BEN DI HONG YAO DOU	0	8.4
HONG YAO ZI DOU	0	8.2
F5718	9	2.6
F5721	1	4.5
SER6	5	8.2
SER8	3	5.8
SER35	3	1.67
SEN32	0	2.67
SEC1	7	6
SEC14	3	7
YIN HONG 4	3	8.75
LONG YUN DOU 6 HAO	3	8.5
HAI YING DOU	1	9
F5875	7	8
F5879	0	4.4
F5910	7	9
F5929	5	6.2
F5939	5	5
HR45	9	1.8
