# Supplementary material for: Genome-Wide Association Study Identifies NBS-LRR-Encoding Genes Related with Anthracnose and Common Bacterial Blight in the Common Bean
Source: Front Plant Sci. 2017 Aug 9;8:1398. doi: 10.3389/fpls.2017.01398 (PMC5552710; doi:10.3389/fpls.2017.01398)
Supplement: Table S8 — Predicted promoter elements of common bean NBS genes. [file Table8.XLS]

## Sheet: Sheet1
Table S8 Predicted promoter elements of common bean NBS genes
	Motif name	Annoation	Gene name
			Phvul.001G018800.1	Phvul.001G018900.1	Phvul.001G062600.1	Phvul.001G093900.1	Phvul.001G128200.1	Phvul.001G132300.1	Phvul.001G132700.1	Phvul.001G132800.1	Phvul.001G133000.1	Phvul.001G133400.1	Phvul.001G133600.1	Phvul.001G134000.1	Phvul.001G134100.1	Phvul.001G134300.1	Phvul.001G134400.1	Phvul.001G134500.1	Phvul.002G021700.1	Phvul.002G075000.1	Phvul.002G075300.1	Phvul.002G098200.1	Phvul.002G129500.1	Phvul.002G129700.1	Phvul.002G129900.1	Phvul.002G130300.1	Phvul.002G130600.1	Phvul.002G130700.1	Phvul.002G131000.1	Phvul.002G131100.1	Phvul.002G131200.1	Phvul.002G133400.1	Phvul.002G133600.1	Phvul.002G135100.1	Phvul.002G135600.1	Phvul.002G166400.1	Phvul.003G002500.1	Phvul.003G002600.1	Phvul.003G002700.1	Phvul.003G002800.1	Phvul.003G003000.1	Phvul.003G072500.1	Phvul.003G129700.1	Phvul.003G247200.1	Phvul.003G247300.1	Phvul.003G247400.1	Phvul.003G247500.1	Phvul.003G269200.1	Phvul.004G005600.1
Essential element	TATA-box	core promoter element around -30 of transcription start	✔	✔	✔	✔	✔	✔	✔	✔	✔	✔	✔	✔	✔	✔	✔	✔	✔	✔	✔	✔	✔	✔	✔	✔	✔	✔	✔	✔	✔	✔	✔	✔	✔	✔	✔	✔	✔	✔	✔	✔	✔	✔	✔	✔	✔	✔	✔
	CAAT-box	common cis-acting element in promoter and enhancer regions	✔	✔	✔	✔	✔	✔	✔	✔	✔	✔	✔	✔	✔	✔	✔	✔	✔	✔	✔	✔	✔	✔	✔	✔	✔	✔	✔	✔	✔	✔	✔	✔	✔	✔	✔	✔	✔	✔	✔	✔	✔	✔	✔	✔	✔	✔	✔
Enhancer	5UTR Py-rich stretch	cis-acting element conferring high transcription levels	✔		✔	✔	✔	✔		✔	✔			✔	✔		✔	✔	✔		✔		✔	✔		✔	✔	✔			✔				✔	✔	✔
	TA-rich region	enhancer										✔				✔										✔				✔	✔													✔
Hormone	ABRE	cis-acting element involved in the abscisic acid responsiveness	✔							✔	✔		✔	✔					✔	✔	✔					✔			✔			✔	✔								✔				✔	✔			✔
	AuxRE	part of an auxin-responsi
	AuxRR-core	cis-acting regulatory element involved in auxin responsiveness																✔	✔	✔													✔
	CE1	cis-acting element associated to ABRE, involved in ABA responsiveness
	CE3	cis-acting element involved in ABA and VP1 responsiveness
	CGTCA-motif	cis-acting regulatory element involved in the MeJA-responsiveness	✔		✔	✔	✔			✔		✔			✔	✔	✔	✔	✔		✔			✔		✔	✔	✔	✔	✔	✔	✔		✔	✔	✔	✔			✔	✔	✔	✔	✔		✔
	GARE-motif	gibberellin-responsive element		✔		✔	✔	✔		✔			✔					✔							✔			✔		✔			✔									✔		✔	✔		✔
	motif IIb	abscisic acid responsive elemen
	P-box	gibberellin-responsive element																✔		✔		✔		✔	✔	✔			✔															✔
	SARE	cis-acting element involved in salicylic acid responsiveness
	TATC-box	cis-acting element involved in gibberellin-responsiveness
	TCA-element	cis-acting element involved in salicylic acid responsiveness	✔	✔	✔	✔			✔			✔	✔			✔		✔		✔			✔			✔	✔	✔			✔		✔	✔	✔		✔			✔			✔		✔	✔
	TGA-box	part of an auxin-responsive element
	TGACG-motif	cis-acting regulatory element involved in the MeJA-responsiveness	✔		✔	✔	✔		✔	✔		✔			✔	✔	✔	✔	✔		✔			✔		✔	✔	✔	✔	✔	✔	✔		✔	✔	✔	✔			✔	✔	✔	✔	✔		✔
	ERE	ethylene-responsive element													✔													✔
	TGA-element	auxin-responsive element	✔	✔			✔								✔		✔	✔	✔									✔				✔										✔	✔
Light responsive	3-AF1 binding site	light responsive element	✔																	✔			✔		✔	✔	✔						✔												✔	✔			✔
	4cl-CMA2b	light responsive element
	AAAC-motif	light responsive element																	✔
	ACA-motif	part of gapA in (gapA-CMA1) involved with light responsiveness
	ACE	cis-acting element involved in light responsiveness	✔	✔		✔		✔	✔			✔		✔		✔	✔							✔		✔	✔	✔	✔		✔	✔	✔				✔				✔		✔	✔
	AE-box	part of a module for light response	✔		✔	✔								✔		✔		✔	✔		✔	✔											✔	✔	✔	✔	✔	✔	✔	✔			✔
	as-2-box	involved in shoot-specific expression and light responsiveness	✔					✔					✔					✔					✔																									✔
	AT1-motif	part of a light responsive module							✔	✔									✔	✔		✔	✔	✔	✔	✔		✔	✔		✔			✔	✔				✔	✔	✔	✔			✔
	ATCC-motif	part of a conserved DNA module involved in light responsiveness								✔
	ATC-motif	part of a conserved DNA module involved in light responsiveness							✔												✔												✔				✔
	ATCT-motif	part of a conserved DNA module involved in light responsiveness	✔										✔			✔								✔	✔				✔		✔		✔	✔	✔		✔	✔	✔				✔	✔	✔			✔
	Box 4	part of a conserved DNA module involved in light responsiveness	✔	✔	✔	✔	✔	✔	✔	✔	✔	✔		✔		✔	✔	✔	✔	✔		✔		✔	✔	✔	✔	✔	✔	✔	✔	✔	✔	✔	✔	✔	✔	✔	✔	✔	✔	✔	✔	✔	✔	✔	✔	✔	✔
	Box I	light responsive element	✔	✔	✔	✔	✔	✔			✔		✔	✔	✔		✔	✔		✔	✔	✔	✔		✔	✔			✔	✔	✔		✔	✔	✔	✔	✔	✔		✔	✔	✔	✔		✔	✔	✔	✔	✔
	Box II	part of a conserved DNA module involved in light responsiveness																✔			✔
	CAG-motif	part of a light response element
	CATT-motif	part of a light responsive element														✔					✔				✔									✔	✔								✔			✔
	C-box	cis-acting regulatory element involved in light responsiveness
	chs-CMA1a	part of a light responsive element	✔	✔	✔					✔				✔			✔												✔			✔								✔
	chs-CMA2a	part of a light responsive element							✔
	chs-CMA2b	part of a light respon																																								✔							✔
	chs-Unit 1 m1	part of a light responsive element				✔											✔	✔										✔
	GAG-motif	part of a light responsive element	✔		✔	✔	✔	✔	✔					✔	✔	✔			✔	✔		✔				✔	✔	✔					✔	✔	✔											✔	✔
	GA-motif	part of a light responsive element	✔	✔						✔	✔			✔	✔			✔			✔			✔	✔		✔	✔														✔	✔	✔
	Gap-box	part of a light responsive element			✔																																					✔							✔
	GATA-motif	part of a light responsive element	✔	✔	✔				✔							✔			✔				✔				✔	✔			✔			✔	✔							✔		✔		✔			✔
	GATT-motif	part of a light responsive element
	G-box	cis-acting regulatory element involved in light responsiveness	✔	✔		✔		✔	✔	✔	✔	✔		✔	✔	✔	✔	✔	✔	✔	✔		✔	✔	✔	✔	✔	✔			✔	✔	✔	✔	✔	✔		✔	✔	✔	✔		✔	✔	✔	✔	✔		✔
	GT1-motif	light responsive element		✔	✔		✔	✔	✔					✔		✔		✔	✔		✔		✔		✔	✔	✔				✔		✔	✔			✔		✔	✔	✔	✔			✔	✔	✔
	GTGGC-motif	part of a light responsive
	H-box	cis-acting regulatory element involved in light responsiveness
	I-box	part of a light responsive element	✔	✔		✔	✔				✔				✔	✔					✔			✔					✔			✔	✔		✔	✔	✔	✔	✔		✔	✔		✔		✔
	LAMP-element	part of a light responsive element													✔									✔	✔		✔					✔				✔
	L-box	part of a light responsive element													✔																									✔
	LS7	part of a light responsive element																																				✔	✔	✔
	MNF1	light responsive element			✔	✔		✔				✔	✔		✔	✔	✔					✔																					✔
	MRE	MYB binding site involved in light responsiveness		✔																				✔			✔	✔			✔			✔	✔		✔				✔		✔	✔			✔
	Pc-CMA2a	part of a light responsive eleme																					✔
	rbcS-CMA7a	part of a light responsive element
	sbp-CMA1a	part of a light responsive element
	sbp-CMA1c	part of a light responsive element
	Sp1	light responsive element			✔						✔		✔		✔	✔					✔		✔						✔			✔				✔	✔			✔	✔	✔		✔		✔			✔
	TCCC-motif	part of a light responsive element																		✔	✔		✔						✔														✔			✔
	TCT-motif	part of a light responsive element	✔		✔		✔			✔		✔	✔	✔	✔		✔	✔		✔	✔	✔		✔	✔	✔	✔			✔	✔		✔			✔		✔	✔			✔	✔	✔				✔	✔
	TGG-motif	part of a light responsive elemen																																						✔								✔
	GGA-motif	part of a light responsive
Abiotic stress	C-repeat/DRE	regulatory element involved in cold- and dehydration-responsiveness		✔
	HSE	cis-acting element involved in heat stress responsiveness	✔		✔			✔		✔	✔					✔	✔	✔		✔			✔	✔	✔	✔			✔			✔	✔	✔		✔	✔	✔	✔	✔	✔	✔			✔			✔	✔
	LTR	cis-acting element involved in low-temperature responsiveness										✔					✔					✔						✔						✔	✔							✔	✔	✔
	MBS	MYB binding site involved in drought-inducibility	✔	✔	✔	✔		✔	✔	✔	✔	✔	✔	✔	✔	✔		✔	✔	✔	✔	✔		✔	✔	✔		✔		✔	✔	✔		✔	✔	✔		✔			✔		✔		✔	✔			✔
	WUN-motif	wound-responsive element								✔	✔								✔	✔						✔	✔					✔							✔	✔				✔				✔
	TC-rich repeats	cis-acting element involved in defense and stress responsiveness		✔	✔		✔	✔	✔	✔		✔	✔	✔	✔	✔	✔				✔	✔	✔		✔	✔	✔	✔	✔	✔		✔	✔	✔	✔	✔	✔	✔	✔	✔		✔	✔	✔	✔	✔	✔	✔	✔
	Box-W1	fungal elicitor responsive element	✔			✔	✔			✔	✔		✔		✔	✔					✔	✔								✔		✔		✔	✔		✔									✔	✔
Tissue specific expression	AACA_motif	involved in endosperm-specific negative
	as1	cis-acting regulatory element involved in the root-specific expression
	CCGTCC-box	cis-acting regulatory element related to meristem specific activation																										✔
	dOCT	cis-acting regulatory element related to meristem specific activation																	✔
	GC-motif	enhancer-like element involved in anoxic specific induc																		✔																								✔
	RY-element	cis-acting regulatory element involved in seed-specific regulation																																												✔
Other elements	ARE	cis-acting regulatory element essential for the anaerobic induction	✔	✔	✔		✔		✔			✔			✔		✔	✔	✔	✔	✔	✔		✔	✔			✔	✔	✔	✔	✔	✔					✔	✔	✔		✔	✔	✔	✔	✔	✔	✔	✔
	ATGCAAAT motif	cis-acting regulatory element associated to the TGAGTCA motif					✔													✔						✔		✔	✔		✔								✔			✔	✔		✔		✔	✔
	AT-rich element	binding site of AT-rich DNA binding protein (ATBP-1)								✔								✔		✔		✔	✔			✔				✔		✔				✔	✔	✔	✔	✔								✔	✔
	AT-rich sequence	element for maximal elicitor-mediated activation (2copies)							✔							✔										✔	✔														✔			✔		✔
	Box III	protein binding site	✔	✔		✔									✔	✔					✔		✔			✔	✔							✔	✔					✔									✔
	CAT-box	cis-acting regulatory element related to meristem expression										✔	✔			✔	✔	✔	✔	✔	✔							✔	✔		✔			✔	✔
	circadian	cis-acting regulatory element involved in circadian control	✔					✔	✔	✔			✔	✔	✔	✔			✔	✔		✔	✔	✔		✔	✔	✔	✔	✔	✔	✔	✔	✔	✔	✔	✔	✔	✔	✔	✔	✔	✔		✔	✔		✔
	HD-Zip 1	element involved in differentiation of the palisade mesophyll cells						✔					✔																								✔		✔		✔								✔
	HD-Zip 2	element involved in the control of leaf morphology development			✔																						✔										✔		✔		✔								✔
	HD-Zip 3	protein binding site																																						✔
	MSA-like	cis-acting element involved in cell cycle regulation
	O2-site	cis-acting regulatory element involved in zein metabolism regulation			✔	✔		✔		✔	✔							✔			✔					✔				✔			✔	✔	✔					✔			✔			✔			✔
	OBP-1 site	cis-acting regulatory element		✔															✔																	✔
	Skn-1_motif	cis-acting regulatory element required for endosperm expression	✔		✔	✔	✔		✔	✔	✔	✔	✔	✔	✔	✔	✔	✔	✔	✔	✔	✔	✔	✔	✔	✔	✔	✔	✔	✔	✔	✔		✔	✔	✔	✔	✔	✔	✔	✔	✔	✔	✔	✔	✔	✔	✔	✔
	GCN4_motif	cis-regulatory element involved in endosperm expression		✔				✔	✔				✔			✔	✔	✔			✔	✔		✔	✔		✔		✔	✔			✔	✔	✔							✔				✔			✔
	MBSI/MBSII	MYB binding site involved in flavonoid biosynthetic genes regulation	✔	✔				✔		✔	✔								✔						✔											✔			✔			✔			✔	✔		✔
[truncated: 131 more columns]
